## Correction: Vanillic acid attenuates testosterone-induced benign prostatic hyperplasia in rats and inhibits proliferation of prostatic epithelial cells

Yunu Jung<sup>1,\*</sup>, Jinbong Park<sup>2,\*</sup>, Hye-Lin Kim<sup>2</sup>, Dong-Hyun Youn<sup>1</sup>, JongWook Kang<sup>1</sup>, Seona Lim<sup>1</sup>, Mi-Young Jeong<sup>2</sup>, Gautam Sethi<sup>3</sup>, Sung-Joo Park<sup>4</sup>, Kwang Seok Ahn<sup>2</sup> and Jae-Young Um<sup>1,2</sup>

<sup>1</sup> Department of Science in Korean Medicine, Graduate School, Kyung Hee University, Dongdaemun-Gu, Seoul 02447, Republic of Korea

<sup>2</sup> Basic Research Laboratory for Comorbidity Regulation, College of Korean Medicine, Kyung Hee University, Dongdaemun-Gu, Seoul 02447, Republic of Korea

<sup>3</sup> Department of Pharmacology, Yong Loo Lin School of Medicine, National University of Singapore, Singapore 117600, Singapore

<sup>4</sup> Department of Herbology, College of Oriental Medicine, Wonkwang University, Iksan, Jeonbuk 54538, Republic of Korea

\* These authors have contributed equally to this work

Published: July 16, 2019

**Copyright:** Jung et al. This is an open-access article distributed under the terms of the Creative Commons Attribution License 3.0 (CC BY 3.0), which permits unrestricted use, distribution, and reproduction in any medium, provided the original author and source are credited.

**This article has been corrected:** Due to errors in image processing, an IHC staining slide of ER in Figure 4 was used twice by mistake. The proper Figure 4 is shown below. The authors declare that these corrections do not change the results or conclusions of this paper.

Original article: Oncotarget. 2017; 8:87194-87208. <https://doi.org/10.18632/oncotarget.19909>

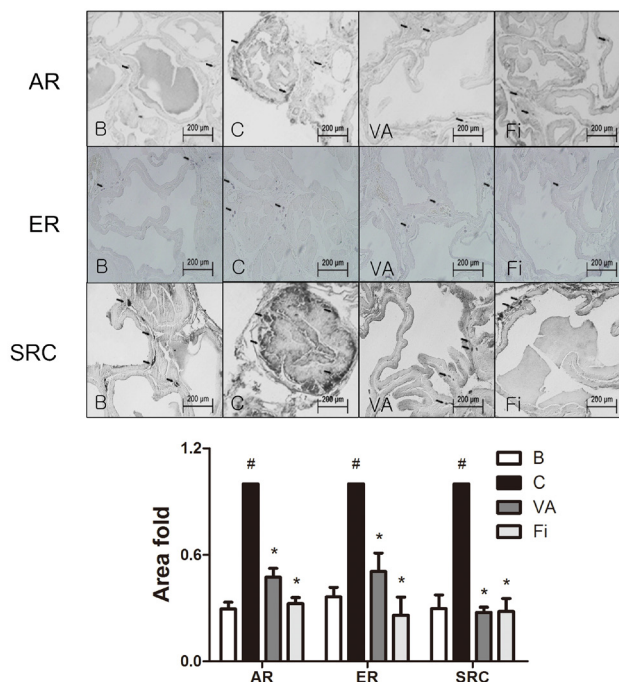

**Figure 4: Immunohistochemical analysis of AR, ER $\alpha$  and SRC1 in the prostate tissues of TP-induced BPH rats.** Representative photomicrographs of the immunohistochemically stained prostate tissues (upper panels, magnification  $\times 400$ ) and relative density of the positively immunostained area (lower panels) of AR, ER $\alpha$  and SRC1 of each group. Values are the mean  $\pm$  S.D. of the data from three or more separate experiments. <sup>#</sup> $P < 0.05$  when compared to B; <sup>\*</sup> $P < 0.05$  when compared to C. B, normal control group; C, TP-induced BPH group; VA, VA-treated BPH group; Fi, Fi-treated BPH group.
